1 **Improved diagnosis of viral encephalitis in adult and pediatric hematological patients using viral**  
2 **metagenomics**

3

4 Ellen C. Carbo<sup>a</sup>, Emilie P. Buddingh<sup>b</sup>, Evita Karelioti<sup>c</sup>, Igor Sidorov<sup>a</sup>, Mariet C.W. Feltkamp<sup>a</sup>, Peter A.  
5 von dem Borne<sup>d</sup>, Jan J.G.M. Verschuuren<sup>e</sup>, Aloys C.M. Kroes<sup>a</sup>, Eric C.J. Claas<sup>a</sup>, Jutte J.C. de Vries<sup>a,\*</sup>

6

7 <sup>a</sup> Department of Medical Microbiology, Leiden University Medical Center, Leiden, The Netherlands

8 <sup>b</sup> Willem-Alexander Children's Hospital, Department of Pediatrics, Leiden University Medical Center,  
9 Leiden, The Netherlands

10 <sup>c</sup> GenomeScan B.V., Leiden, The Netherlands

11 <sup>d</sup> Department of Hematology, Leiden University Medical Center, Leiden, The Netherlands

12 <sup>e</sup> Department of Neurology, Leiden University Medical Center, Leiden, The Netherlands

13

14 \* Corresponding author, E-mail address: [jjcdevries@lumc.nl](mailto:jjcdevries@lumc.nl)

15

16 Word count, abstract: 233

17 Word count, manuscript: 2157

## 18 **Highlights**

- 19       • A metagenomics protocol employing virus capture probes was validated and retrospectively  
20       applied to 41 hematological adult and pediatric patients presenting with encephalitis of  
21       unknown aetiology
- 22       • Viral enrichment by capture probes increased sensitivity of viral metagenomics on  
23       cerebrospinal fluid samples 100 – 10.000 fold, compared to unenriched metagenomic  
24       sequencing
- 25       • In 12% of hematological patients with encephalitis of unknown origin, a virus was detected  
26       by viral metagenomics, which was not found by routine diagnostics
- 27       • Viral metagenomics represents a valuable addition to the diagnostics repertoire for  
28       hematological patients with suspected CNS infection

29

30 **Abstract**

31 Metagenomic sequencing is a powerful technique that enables detection of the full spectrum of  
32 pathogens present in any specimen in a single test. Hence, metagenomics is increasingly being  
33 applied for detection of viruses in clinical cases with suspected infections of unknown etiology and a  
34 large number of relevant potential causes. This is typically the case in patients presenting with  
35 encephalitis, in particular when immunity is impaired by underlying disorders.

36 In this study, viral metagenomics has been applied to a cohort of hematological patients with  
37 encephalitis of unknown origin.

38 Since viral loads in cerebrospinal fluid of patients with encephalitis are generally low, the technical  
39 performance of a metagenomic sequencing protocol enriched by capture probes targeting all known  
40 vertebrate viral sequences was studied. Subsequently, the optimized viral metagenomics protocol  
41 was applied to a cohort of hematological patients with encephalitis of unknown origin.

42 Viral enrichment by capture probes increased the viral sequence read count of metagenomics on  
43 cerebrospinal fluid samples 100 – 10,000 fold, compared to unenriched metagenomic sequencing.

44 In five out of 41 (12%) hematological patients with encephalitis, a virus was detected by viral  
45 metagenomics which had not been detected by current routine diagnostics. BK polyomavirus,  
46 hepatitis E virus, human herpes virus-6 and Epstein Barr virus were identified by this unbiased  
47 metagenomic approach.

48 This study demonstrated that hematological patients with encephalitis of unknown origin may  
49 benefit from early viral metagenomics testing as a single step approach.

50

51 **Introduction**

52 Encephalitis is an important clinical condition with high morbidity and mortality and therefore  
53 necessitates a proper and timely diagnosis and pathogen identification [1]. However, up to 63% of  
54 the encephalitis cases remain undiagnosed [1] and as a result, no targeted treatment can be  
55 initiated, no specific prognostic information can be obtained, and in outbreak settings no effective  
56 preventive measures can be taken.

57 Metagenomic next-generation sequencing has the potential to detect the full spectrum of viral  
58 pathogens in a single test. An increasing number of case reports have described the application of  
59 metagenomics to clinical cases of encephalitis of unknown origin in both immunocompetent and  
60 immunocompromised patients [2-15]. Immunocompromised patients are most at risk of infection  
61 with unexpected and novel pathogens and may present with insidious clinical symptoms [2, 16].  
62 Recent prospective studies evaluated the use of viral metagenomics for undiagnosed cases in  
63 parallel with conventional diagnostics over a period of one year or longer [17, 18]. The minority of  
64 the patients included were immunocompromised, mainly due to HIV and solid organ transplants. To  
65 date, no metagenomic cohort studies have been published focusing on hematological patients with  
66 encephalitis.

67 Cerebrospinal fluid (CSF) remains the most common sample type obtained for diagnostics in cases of  
68 encephalitis, though brain biopsies tend to have a higher diagnostic yield of metagenomics [2, 10,  
69 19, 20] as viral loads are lower in CSF. Moreover, metagenomic analysis is greatly affected by an  
70 extremely low pathogen-to-host genome ratio. Consequently, a lower sensitivity of metagenomic  
71 sequencing has been reported, when compared with conventional PCR-based molecular assays [21-  
72 26]. Host cell depletion is one way to increase the relative abundance of viral nucleic acids in  
73 metagenomic sequencing, but has not consistently been reported as beneficial when analyzing  
74 clinical samples [26]. In contrast, virus genome enrichment by means of capture probes has been

75 shown to significantly enhance virus detection when sequencing for example respiratory samples  
76 [27-30].

77 In this study, the technical performance of a metagenomic sequencing protocol using capture probes  
78 targeting all known vertebrate viral sequences was determined when applied to CSF samples. This  
79 technical performance study was followed by a retrospective cohort study with hematologic adult  
80 and pediatric patients with encephalitis of unknown etiology.

81

## 82 **Methods**

### 83 Patient and sample selection

84 For the technical validation study, fifteen CSF samples of patients with encephalitis of known  
85 etiology previously sent to the Clinical Microbiological Laboratory (CML) of the Leiden University  
86 Medical Center (LUMC, The Netherlands) in the period of 2012-2017 were selected based on  
87 positive real-time PCR findings. These samples were tested by means of a lab-developed  
88 metagenomic protocol with and without viral capture probes. Additionally, three tissue biopsies  
89 from enteral origin were tested since brain biopsies were only limited available.

90 Following the technical validation, a cohort of 41 adult and pediatric hematological LUMC patients  
91 presenting with clinical symptoms of encephalitis was selected for retrospective analysis. Their CSF  
92 samples and brain tissue (one patient) were previously sent to the CML for routine diagnostics in the  
93 period of 2011-2019 and selected based on negative real-time PCR results for viral and bacterial  
94 pathogens.

95

### 96 Ethical approval

97 This study was approved by the medical ethics review committee of the Leiden University Medical  
98 Center (CME number B19.021)

99

### 100 Routine real-time PCR testing (PCR)

101 In the absence of relevant travel history, the laboratory-developed molecular real-time PCR panel for  
102 detection of pathogens in CSF consists of herpes simplex virus type 1 and 2 (HSV1/2), varicella zoster  
103 virus, enterovirus and parechovirus. In immunocompromised patients, the panel is expanded with  
104 Epstein Barr virus, human cytomegalovirus, JC virus and human herpesvirus type 6 (HHV-6), upon

105 clinical request. These real-time PCRs are performed with internal controls for nucleic acid extraction  
106 and real-time PCR inhibition as published previously [31-37]. The initial diagnostic results were  
107 confirmed in this study by retesting (see table 1) to ensure the sample integrity after storage at -  
108 80°C.

109

110 Metagenomic next-generation sequencing (mNGS)

111 The metagenomics protocol used has previously been described and optimized for simultaneous  
112 detection of RNA and DNA targets [38, 39]. In short, internal controls, equine arteritis virus (EAV) for  
113 RNA and phocid herpesvirus-1 (PhHV) for DNA viruses were spiked into the clinical samples.  
114 Subsequently, nucleic acids were extracted directly from 200 µl CSF sample using the MagNApure 96  
115 DNA and Viral NA Small volume extraction kit on the MagNAPure 96 system (Roche Diagnostics,  
116 Almere, The Netherlands) with 100 µL output eluate. Extraction buffer only was used as negative  
117 control (for extraction, library preparation, and sequencing). From each sample 50 ul of eluate was  
118 used as input and concentrated using the SpeedVac vacuum concentrator (Eppendorf). Samples  
119 were dissolved in 10 µl of master mix for fragmentation (consisting of NEB next First Strand  
120 Synthesis, random primers and nuclease free water). RNA library preparation was performed using  
121 NEBNext Ultra II Directional RNA Library prep kit for Illumina with several in-house adaptations [39]  
122 to the manufacturers protocol in order to enable simultaneous detection of both DNA and RNA in a  
123 single tube per sample. Poly A mRNA capture isolation, rRNA depletion and DNase treatment steps  
124 were omitted, and diluted full size Y-shaped, dual indexed adaptors (1.5 uM) were used. For  
125 comparison, library preparation by means of the NEBNext Ultra II DNA Library preparation kit was  
126 performed with preceding cDNA and second strand synthesis step. Resulting amplified libraries were  
127 used as input material for capture of specific target regions or were subjected to sequence analysis  
128 without further processing.

129 Clustering and metagenomic sequencing using the NovaSeq6000 sequencing system (Illumina, San  
130 Diego, CA, USA) was performed according to manufacturer's protocols. Primary data analysis and  
131 results Image analysis, base calling, and quality check was performed with the Illumina data analysis  
132 pipeline RTA3.4.4 and bcl2fastq v2.20. Approximately 10 million 150 bp paired-end reads were  
133 obtained per sample.

134

135 Viral capture probe enrichment

136 The quality and quantity of the amplified libraries before capture were determined using the  
137 Fragment Analyzer (Agilent) and Qubit (Invitrogen) respectively. For capturing, 250 ng of four  
138 amplified DNA libraries were combined in a single pool resulting in a combined mass of 1 µg. For  
139 enrichment of the DNA sample library pools, the SeqCap EZ HyperCap Workflow User's Guide  
140 (Roche) was followed with several in-house adaptations to the manufacturers protocol. Briefly,  
141 human Cot DNA and blocking oligos (Integrated DNA Technologies) were added to each library pool  
142 to block non-specific cross hybridization. The target regions were captured by hybridizing each pool  
143 of four sample libraries with the SeqCap EZ probe pool [40] overnight. The HyberCap Target  
144 Enrichment kit and Hyber Cap Bead kit were used for washing and recovery of the captured DNA.  
145 Finally, post-capture PCR amplification was performed using KAPA HiFi HotStart ReadyMix (2X) and  
146 Illumina NGS primers (5 µM), followed by DNA purification using AMPure XP beads. Quality and  
147 quantity of the post-capture multiplexed libraries were determined by Fragment Analyzer (Agilent)  
148 or Bioanalyzer (Agilent).

149

150 Bioinformatic analysis

151 After quality pre-processing, sequencing reads were taxonomically classified with the pipeline  
152 Centrifuge [41] using an index database constructed from NCBI's RefSeq and taxonomy databases  
153 (accessed April 4<sup>th</sup>, 2019). Reads with multiple best matches were uniquely assigned to the lowest  
154 common ancestor (k = 1 Centrifuge setting; previously validated [39]). Negative control sequence



155 reads were subtracted from patient sample reads by Recentrifuge 0.28.7 [42]. Metagenomic findings  
156 were confirmed by a second pipeline, GenomeDetective [43] version 1.111 (accessed December  
157 2018—January 2019) accounting for horizontal genome coverage (%) and confirmatory real-time  
158 PCR. Read counts were normalized for total read count and genome size.

159

160

161 **Results**

162 Technical performance on PCR-positive CSF samples

163 The results of the comparison of the metagenomic protocol with and without viral enrichment using  
 164 capture probes for real-time PCR positive clinical CSF samples are shown in table 1. The  
 165 metagenomic protocol without enrichment failed to detect the target viruses in three out of 18  
 166 cases. In contrast, the metagenomic protocol with enrichment for vertebrate viruses by capture  
 167 probes detected all viruses that had been detected by real-time PCR. The target virus read counts  
 168 were increased 100-10.000 fold after viral enrichment. Plots of horizontal coverage of viral  
 169 sequences, with and without viral capture probes, are shown in Figure 1.

170

171 Table 1

172 Comparison of the metagenomic protocol with and without viral capture probes in a panel of PCR  
 173 positive CSF samples.

| Patient | Sample type | PCR result<br>(Initial Cq-value/load, retested value) | mNGS results,<br>without viral<br>probes (read count,<br>Centrifuge) |                                            | mNGS<br>results,<br>with viral<br>probes<br>(read<br>count,<br>Centrifuge)<br><sup>a</sup> | Increase<br>in read<br>count (-<br>fold) |
|---------|-------------|-------------------------------------------------------|----------------------------------------------------------------------|--------------------------------------------|--------------------------------------------------------------------------------------------|------------------------------------------|
|         |             |                                                       | Adapted<br>RNA<br>prep. <sup>a</sup>                                 | DNA<br>prep.<br>incl.<br>cDNA <sup>b</sup> |                                                                                            |                                          |
| 1       | CSF         | Enterovirus (27, 27)                                  | 0                                                                    | 367                                        | 515.069                                                                                    | 1.404                                    |
| 2       | CSF         | Enterovirus (30, 34)                                  | 0                                                                    | 0                                          | 12.368                                                                                     | >12.368                                  |
| 3       | CSF         | Herpes simplex virus type 1 (25)                      | 6.616                                                                | 4.842                                      | 3.302.218                                                                                  | 499                                      |
| 4       | CSF         | Herpes simplex virus type 1 (30)                      | NT                                                                   | 144                                        | 913.662                                                                                    | 6.345                                    |
| 5       | CSF         | HIV type 1 (302.500c/mL <sup>c</sup> )                | 2.281                                                                | 187                                        | 38.749.926                                                                                 | 16.988                                   |
| 6       | CSF         | Varicella zoster virus(27, 28)                        | 286                                                                  | 0                                          | 334.368                                                                                    | 1.169                                    |
| 7       | CSF         | Varicella zoster virus (30, 28)                       | NT                                                                   | 36                                         | 131.138                                                                                    | 3.643                                    |
| 8       | CSF         | Varicella zoster virus (31, 31)                       | NT                                                                   | 3                                          | 10.241                                                                                     | 3.412                                    |
| 9       | CSF         | Epstein-Barr virus (4.8, 4.3 log <sub>10</sub> IU/mL) | NT                                                                   | 4                                          | 8.172                                                                                      | 2.043                                    |
| 10      | CSF         | Epstein-Barr virus (3.8, 4.1 log <sub>10</sub> IU/mL) | 0                                                                    | 90                                         | 28.044                                                                                     | 312                                      |
| 11      | CSF         | Enterovirus (33, 34)                                  | 0                                                                    | 0                                          | 15.829                                                                                     | >15.829                                  |
| 12      | Biopsy      | Human cytomegalovirus (22, 23)                        | 2.228                                                                | 8.000                                      | 2.047.002                                                                                  | 256                                      |

|    |        |                                                  |    |        |                                    |                |
|----|--------|--------------------------------------------------|----|--------|------------------------------------|----------------|
| 13 | Biopsy | Human cytomegalovirus (22, 26)                   | NT | 193    | 169.154,<br>113.777<br>(duplicate) | 876            |
| 14 | Biopsy | Human cytomegalovirus (24, 28)                   | NT | 96     | 160.639                            | 1.673          |
| 15 | CSF    | Human cytomegalovirus, resistant (27)            | NT | 22.350 | 3.577.617                          | 160            |
| 16 | CSF    | CSF: negative but biopsy astrovirus PCR positive | 0  | 0      | 0                                  | Not applicable |
| 17 | CSF    | Human herpes virus type 6 (32, 26)               | 26 | 306    | 168.837                            | 552            |
| 18 | CSF    | Human herpes virus type 6 (35, 34)               | NT | 0      | 1.283                              | >1.283         |

174 mNGS; metagenomic next-generation sequencing, CSF; cerebrospinal fluid, NT; not tested  
 175 <sup>a</sup> NEBNext Ultra II Directional RNA Library preparation kit with in-house adaptations for total NA  
 176 sequencing (see methods)  
 177 <sup>b</sup> NEBNext Ultra II DNA Library preparation kit preceded by cDNA and 2<sup>nd</sup> strand synthesis for total  
 178 NA sequencing (see methods)  
 179 <sup>c</sup> Insufficient material available for retesting  
 180

181 Retrospective study: clinical cohort

182 Following the validation of the use of the viral capture probes, the metagenomic protocol was used  
 183 for the clinical application study on samples of pediatric and adult hematological patients with  
 184 encephalitis of unknown etiology. In total 46 samples (42 CSF samples, one brain biopsy, three blood  
 185 samples) of 41 patients, including 17 children, were tested. Viral metagenomic sequencing resulted  
 186 in virus detection in four CSF samples and one brain biopsy (5/41, 12%, Table 2). The clinical  
 187 symptoms, underlying condition, imaging findings and treatment are shown in Table 3. In these five  
 188 cases, the virus detected by means of metagenomics had not been targeted by the routine PCR  
 189 assays that were performed initially.

Table 2. Findings by viral metagenomic sequencing of 41 pediatric and adult hematological patients in CSF and brain biopsy samples.

| Patient  | Sample type               | Initially requested molecular diagnostics (real-time PCR, Cq-value)                                                                                                                                                                               | mNGS results (viral probe capture)           | Read count (Centrifuge /Genome Detective) <sup>a</sup> | Genome coverage (Genome Detective) |       | Confirmatory testing (PCR)                              |
|----------|---------------------------|---------------------------------------------------------------------------------------------------------------------------------------------------------------------------------------------------------------------------------------------------|----------------------------------------------|--------------------------------------------------------|------------------------------------|-------|---------------------------------------------------------|
|          |                           |                                                                                                                                                                                                                                                   |                                              |                                                        | %                                  | Depth | Target PCR Cq/load, retested value/load                 |
| 1, child | Brain tissue, post-mortem | Brain biopsy: HSV-1/2, JC virus, enterovirus, parechovirus, HCMV, EBV, HHV6, mycobacterium tuberculosis, and Whipple's disease: negative.<br>Positive: adenovirus Cq 36, EBV Cq 37, HHV-6 Cq 33<br>CSF: Adenovirus, EBV, HHV-6, and VZV: negative | Biopsy: BK polyomavirus<br><br>CSF: negative | 140/<br>857                                            | 63                                 | 33    | BKPyV PCR positive<br>Cq 22/<br>4.031.000, 549.400 c/ml |
| 2, adult | CSF                       | HSV-1/2, VZV, enterovirus, parechovirus, HCMV, EBV, JC virus: negative                                                                                                                                                                            | Human herpesvirus type 6 <sup>a</sup>        | 29.398/<br>225.466                                     | 32 (>30 regions)                   | 576   | HHV-6 PCR positive<br>Cq 26, 29                         |
| 3, adult | CSF                       | HSV1/2, VZV, HCMV, toxoplasma: negative                                                                                                                                                                                                           | Human herpesvirus type 6                     | 1.117/<br>82.961                                       | 5 (>25 regions)                    | 1330  | HHV-6 PCR positive<br>Cq 30, 28                         |
| 4, adult | CSF                       | HSV1/2, VZV, HCMV, EBV, adenovirus, HHV6, BK, JC, enterovirus, and parechovirus: negative                                                                                                                                                         | Hepatitis E virus <sup>a</sup>               | 61/<br>2767                                            | 1                                  | 2690  | HEV PCR positive<br>Cq 36, 37                           |
| 5, adult | CSF                       | HSV-1/2, VZV, HCMV, JC virus, adenovirus, enterovirus, parechovirus, m. pneumoniae, listeria, m. tuberculosis, and HHV-6: negative                                                                                                                | Epstein-Barr virus <sup>a</sup>              | 26618/<br>602.782                                      | 46                                 | 990   | EBV PCR positive<br>Cq 28/ 21.380c/ml                   |

Cq-value; quantification cycle value, mNGS; metagenomic next-generation sequencing, ped.; pediatric patient, HSV-1/2; herpes simplex virus type 1/2, HCMV; human cytomegalovirus, EBV; Epstein Barr virus, HHV-6; human herpes virus type 6, VZV; varicella zoster virus; BKPyV; BK polyomavirus, CSF; cerebrospinal fluid

<sup>a</sup> Initially not tested for by PCR but diagnosed with a delay of up to 2 weeks

Table 3. Clinical data of the patients with additional mNGS findings (see Table 2).

|          | Age, sex | Underlying condition                                    | Clinical signs                                                                   | Brain MRI findings                                                                               | Pathology findings                                                         | Other sample types & target                          | Antiviral treatment                                             | Neurological outcome                                       |
|----------|----------|---------------------------------------------------------|----------------------------------------------------------------------------------|--------------------------------------------------------------------------------------------------|----------------------------------------------------------------------------|------------------------------------------------------|-----------------------------------------------------------------|------------------------------------------------------------|
| 1, child | 5, M     | AML, 26 d post-SCT no engraftment, neutropenic          | Somnolent, pupils dilated, opisthotonus, panuveitis of the left eye              | Bilateral asymmetrical hyperintense lesions, compatible with demyelination in the context of PML | Post mortem brain biopsy: inflammation, granulomatous, lymphocytes. No AML | BK virus PCR on plasma: negative, Urine: Cq 13       | Foscarnet for clinically suspected HHV6 encephalitis            | Deceased from fatal encephalitis 54 d post-SCT             |
| 2, adult | 30, M    | AML, 23 d post-cord blood transplant, neutropenic       | Comatose, status epilepticus                                                     | Symmetrical hyperintensity bilateral temporal, mid frontal, and hippocampus; limbic encephalitis | -                                                                          | HHV-6 PCR on plasma Cq 29-37 (<< CSF load)           | ACV, 6d after disease onset (HHV-6 PCR+): GCV, duration 4 weeks | Partial neurological recovery, persistent cognitive damage |
| 3, adult | 51, F    | Hodgkin, 7 d post autologous SCT, neutropenia           | Dysarthria, apathia, pupil anisocoria, headache, insult, mutism, nuchal rigidity | Dural and multifocal sulci hyperintensity; meningo-encephalitis                                  | CSF: lymphocytes                                                           | No plasma/serum available                            | ACV empirically                                                 | Neurological recovery                                      |
| 4, adult | 52, M    | Multiple myeloma, 14 d post-allogeneic SCT, neutropenic | Progressive tetraparesis                                                         | No enhancement, no tumor EMG: axonal polyneuropathy                                              | CSF: no myeloma cells                                                      | HEV PCR on plasma: Cq 25-33 (retrospectively tested) | Ribavirin, IVIG                                                 | Progression, cognitive symptoms                            |
| 5, adult | 78, M    | 7 y post-pancreas island transplant                     | Decreased consciousness, epileptic insults                                       | Bilateral temporal and (sub)cortical enhancement; encephalitis, no signs of lymphoma/PTLD        | Intestinal biopsies: EBV negative                                          | Plasma EBV PCR: 168 and 448 c/ml (<< CSF load)       | Rituximab 3 gifts                                               | Partial neurological recovery; somnolence                  |

mNGS; metagenomic next-generation sequencing, ped.; pediatric patient, AML; acute myeloid leukemia, SCT; stem cell transplant, PML; progressive multifocal leukoencephalopathy, HHV-6; human herpes virus type 6, ACV; acyclovir, PTLD; post-transplant lymphoproliferative disease

1  
2  
3 Discussion

4 In this study, a metagenomic sequencing protocol employing virus capture probes was shown to be  
5 highly sensitive and of added value for detection of viruses when applied to a cohort of hematologic  
6 adult and pediatric patients with encephalitis of unknown origin. When compared to conventional  
7 molecular assays, viral metagenomic sequencing resulted in 12% additional findings, including some  
8 unexpected viruses initially not tested for.

9 An increase in the number of case reports involving the experimental use of metagenomic  
10 sequencing for diagnosing encephalitis in immunocompetent [3-6, 8, 11-13] and  
11 immunocompromised [7, 9, 10, 14, 15] patients is evident in recent literature [2, 44]. In these  
12 reported cases, the causes of encephalitis detected by metagenomic sequencing were novel,  
13 previously unknown viruses, but also, with similar frequency, well-established causes which could  
14 have been identified by conventional molecular techniques if only requested [2]. Other agents that  
15 were involved were known human pathogens that previously not had been observed as a causative  
16 agent of encephalitis [2]. Given the bias towards publication of cases with novel viruses, it is  
17 expected that when performing cohort studies, novel viruses will be less prominent, in line with our  
18 study. It must be noted that detection of novel viruses using a protocol employing virus capture  
19 probes is dependent on the amount of sequence similarity between novel and known viruses. None  
20 of the recent retrospective [45] and prospective [17, 18, 46, 47] cohort studies on metagenomic  
21 sequencing focused on neutropenic hematological patients, whom are likely at increased risk of  
22 infectious causes of encephalitis.

23 The clinical significance of detection of possibly latent and low level persistent viruses in CSF may be  
24 difficult to determine. Cohort studies do not provide the best support for causal relationships and  
25 the presence of the viruses detected in CSF in this study needs further investigation. For example,  
26 encephalitis caused by BK polyomavirus (BKPyV) has been indeed described in a series of case

27 reports [48]. BK virus-associated progressive multifocal leukoencephalitis has previously only been  
28 reported in five cases [49]. In the current case, BKPyV was detected in brain tissue, which is  
29 considered the best support for diagnosing BKPyV virus encephalitis [49]. The absence of BK viremia  
30 in our case suggests localized reactivation of BKPyV in the central nervous system (CNS).

31 Likewise, positive findings of potentially latent viruses such as HHV-6 and EBV should be interpreted  
32 in the context of clinical presentation and sample type. HHV-6 DNA can be detected in the blood of  
33 approximately 50% of the hematopoietic stem cell transplant recipients [50], while the reported  
34 incidence of HHV-6 encephalitis is only 1% [51]. The presence of high viral loads in CSF when  
35 compared to blood, as seen in our cases of HHV-6 and EBV reactivation, is suggestive for localized  
36 CNS reactivation.

37 Hepatitis E virus (HEV) infection is associated with neurological dysfunctions, such as encephalitis  
38 and Guillain-Barré syndrome. This is supported by both clinical and laboratory studies, detecting HEV  
39 RNA in brain tissues of animals after experimental infection [52]. Neurological manifestations of  
40 hepatitis E virus infections are more frequently found in immunocompetent patients, suggesting  
41 pathophysiological mechanisms involving the immune response [53]. This may be the case in our  
42 patient given the lower viral load in CSF.

43 Though brain biopsies tend to have a higher diagnostic yield of metagenomics [2, 10, 19, 20], the  
44 most commonly acquired sample type in cases of encephalitis is CSF. Given the commonly low viral  
45 loads in CSF, optimal sensitivity is essential but challenging due to the high amount of background  
46 sequences [21-26]. Technical validation studies of viral metagenomic protocols using cerebrospinal  
47 fluid samples with known pathogens [25, 26, 54, 55] are essential to gain insight in its analytical  
48 performance including sensitivity. Virus enriched sequence analysis after probe capture has been  
49 shown to enhance virus detection significantly in respiratory samples [27-30, 56]. The current study  
50 confirms an increased sensitivity in CSF and tissue samples as well.



51 Summarized, the usefulness of viral metagenomics is dependent on several factors, including the  
52 technical aspects of the protocol, and the patient population studied. The current study shows that  
53 hematological patients may benefit from early, unbiased diagnostics by means of a virus enriched  
54 metagenomic sequencing protocol.

55

56 Declarations of interest: none

57

58

59 References

- 60 1. Granerod, J. and N.S. Crowcroft, *The epidemiology of acute encephalitis*. *Neuropsychol Rehabil*, 2007. **17**(4-5): p. 406-28.
- 61 2. Brown, J.R., T. Bharucha, and J. Breuer, *Encephalitis diagnosis using metagenomics: application of next generation sequencing for undiagnosed cases*. *J Infect*, 2018. **76**(3): p. 225-240.
- 62 3. Chiu, C.Y., et al., *Diagnosis of Fatal Human Case of St. Louis Encephalitis Virus Infection by Metagenomic Sequencing, California, 2016*. *Emerg Infect Dis*, 2017. **23**(10): p. 1964-1968.
- 63 4. Edridge, A.W.D., et al., *Novel Orthobunyavirus Identified in the Cerebrospinal Fluid of a Ugandan Child With Severe Encephalopathy*. *Clin Infect Dis*, 2019. **68**(1): p. 139-142.
- 64 5. Fridholm, H., et al., *Human pegivirus detected in a patient with severe encephalitis using a metagenomic pan-virus array*. *J Clin Virol*, 2016. **77**: p. 5-8.
- 65 6. Hoffmann, B., et al., *A Variegated Squirrel Bornavirus Associated with Fatal Human Encephalitis*. *N Engl J Med*, 2015. **373**(2): p. 154-62.
- 66 7. Lipowski, D., et al., *A Cluster of Fatal Tick-borne Encephalitis Virus Infection in Organ Transplant Setting*. *J Infect Dis*, 2017. **215**(6): p. 896-901.
- 67 8. Mai, N.T.H., et al., *Central Nervous System Infection Diagnosis by Next-Generation Sequencing: A Glimpse Into the Future?* *Open Forum Infect Dis*, 2017. **4**(2): p. ofx046.
- 68 9. Murkey, J.A., et al., *Hepatitis E Virus-Associated Meningoencephalitis in a Lung Transplant Recipient Diagnosed by Clinical Metagenomic Sequencing*. *Open Forum Infect Dis*, 2017. **4**(3): p. ofx121.
- 69 10. Naccache, S.N., et al., *Diagnosis of neuroinvasive astrovirus infection in an immunocompromised adult with encephalitis by unbiased next-generation sequencing*. *Clin Infect Dis*, 2015. **60**(6): p. 919-23.
- 70 11. Perlejewski, K., et al., *Next-generation sequencing (NGS) in the identification of encephalitis-causing viruses: Unexpected detection of human herpesvirus 1 while searching for RNA pathogens*. *J Virol Methods*, 2015. **226**: p. 1-6.
- 71 12. Piantadosi, A., et al., *Rapid Detection of Powassan Virus in a Patient With Encephalitis by Metagenomic Sequencing*. *Clin Infect Dis*, 2018. **66**(5): p. 789-792.
- 72 13. Tschumi, F., et al., *Meningitis and epididymitis caused by Toscana virus infection imported to Switzerland diagnosed by metagenomic sequencing: a case report*. *BMC Infect Dis*, 2019. **19**(1): p. 591.
- 73 14. Wilson, M.R., et al., *A novel cause of chronic viral meningoencephalitis: Cache Valley virus*. *Ann Neurol*, 2017. **82**(1): p. 105-114.
- 74 15. Wilson, M.R., et al., *Acute West Nile Virus Meningoencephalitis Diagnosed Via Metagenomic Deep Sequencing of Cerebrospinal Fluid in a Renal Transplant Patient*. *Am J Transplant*, 2017. **17**(3): p. 803-808.
- 75 16. Saylor, D., K. Thakur, and A. Venkatesan, *Acute encephalitis in the immunocompromised individual*. *Curr Opin Infect Dis*, 2015. **28**(4): p. 330-6.
- 76 17. Kufner, V., et al., *Two Years of Viral Metagenomics in a Tertiary Diagnostics Unit: Evaluation of the First 105 Cases*. *Genes (Basel)*, 2019. **10**(9).
- 77 18. Wilson, M.R., et al., *Clinical Metagenomic Sequencing for Diagnosis of Meningitis and Encephalitis*. *N Engl J Med*, 2019. **380**(24): p. 2327-2340.
- 78 19. Fremont, M.L., et al., *Next-Generation Sequencing for Diagnosis and Tailored Therapy: A Case Report of Astrovirus-Associated Progressive Encephalitis*. *J Pediatric Infect Dis Soc*, 2015. **4**(3): p. e53-7.
- 79 20. Morfopoulou, S., et al., *Deep sequencing reveals persistence of cell-associated mumps vaccine virus in chronic encephalitis*. *Acta Neuropathol*, 2017. **133**(1): p. 139-147.
- 80 21. Wylie, K.M., et al., *Sequence analysis of the human virome in febrile and afebrile children*. *PLoS One*, 2012. **7**(6): p. e27735.

- 109 22. Lim, E.S., et al., *Early life dynamics of the human gut virome and bacterial microbiome in*  
110 *infants*. Nat Med, 2015. **21**(10): p. 1228-34.
- 111 23. Thorburn, F., et al., *The use of next generation sequencing in the diagnosis and typing of*  
112 *respiratory infections*. J Clin Virol, 2015. **69**: p. 96-100.
- 113 24. Junier, T., et al., *Viral Metagenomics in the Clinical Realm: Lessons Learned from a Swiss-*  
114 *Wide Ring Trial*. Genes (Basel), 2019. **10**(9).
- 115 25. Miller, S., et al., *Laboratory validation of a clinical metagenomic sequencing assay for*  
116 *pathogen detection in cerebrospinal fluid*. Genome Res, 2019. **29**(5): p. 831-842.
- 117 26. Oechslin, C.P., et al., *Limited Correlation of Shotgun Metagenomics Following Host Depletion*  
118 *and Routine Diagnostics for Viruses and Bacteria in Low Concentrated Surrogate and Clinical*  
119 *Samples*. Front Cell Infect Microbiol, 2018. **8**: p. 375.
- 120 27. O'Flaherty, B.M., et al., *Comprehensive viral enrichment enables sensitive respiratory virus*  
121 *genomic identification and analysis by next generation sequencing*. Genome Res, 2018.  
122 **28**(6): p. 869-877.
- 123 28. Wylie, K.M., et al., *Detection of Viruses in Clinical Samples by Use of Metagenomic*  
124 *Sequencing and Targeted Sequence Capture*. J Clin Microbiol, 2018. **56**(12).
- 125 29. Wylie, T.N., et al., *Enhanced virome sequencing using targeted sequence capture*. Genome  
126 Res, 2015. **25**(12): p. 1910-20.
- 127 30. Yang, Y., et al., *Targeted Sequencing of Respiratory Viruses in Clinical Specimens for*  
128 *Pathogen Identification and Genome-Wide Analysis*. Methods Mol Biol, 2018. **1838**: p. 125-  
129 140.
- 130 31. Kalpoe, J.S., et al., *Clinical relevance of quantitative varicella-zoster virus (VZV) DNA*  
131 *detection in plasma after stem cell transplantation*. Bone Marrow Transplant, 2006. **38**(1): p.  
132 41-6.
- 133 32. van der Beek, M.T., et al., *Rapid susceptibility testing for herpes simplex virus type 1 using*  
134 *real-time PCR*. J Clin Virol, 2013. **56**(1): p. 19-24.
- 135 33. van Doornum, G.J., et al., *Diagnosing herpesvirus infections by real-time amplification and*  
136 *rapid culture*. J Clin Microbiol, 2003. **41**(2): p. 576-80.
- 137 34. Benschop, K., et al., *Rapid detection of human parechoviruses in clinical samples by real-time*  
138 *PCR*. J Clin Virol, 2008. **41**(2): p. 69-74.
- 139 35. Read, S.J. and J.B. Kurtz, *Laboratory diagnosis of common viral infections of the central*  
140 *nervous system by using a single multiplex PCR screening assay*. J Clin Microbiol, 1999. **37**(5):  
141 p. 1352-5.
- 142 36. Kalpoe, J.S., et al., *Validation of clinical application of cytomegalovirus plasma DNA load*  
143 *measurement and definition of treatment criteria by analysis of correlation to antigen*  
144 *detection*. J Clin Microbiol, 2004. **42**(4): p. 1498-504.
- 145 37. Lankester, A.C., et al., *Epstein-Barr virus (EBV)-DNA quantification in pediatric allogeneic stem*  
146 *cell recipients: prediction of EBV-associated lymphoproliferative disease*. Blood, 2002. **99**(7):  
147 p. 2630-1.
- 148 38. van Rijn, A.L., et al., *The respiratory virome and exacerbations in patients with chronic*  
149 *obstructive pulmonary disease*. PLoS One, 2019. **14**(10): p. e0223952.
- 150 39. van Boheemen, S., et al., *Retrospective Validation of a Metagenomic Sequencing Protocol for*  
151 *Combined Detection of RNA and DNA Viruses Using Respiratory Samples from Pediatric*  
152 *Patients*. J Mol Diagn, 2019.
- 153 40. Briese, T., et al., *Virome Capture Sequencing Enables Sensitive Viral Diagnosis and*  
154 *Comprehensive Virome Analysis*. mBio, 2015. **6**(5): p. e01491-15.
- 155 41. Kim, D., et al., *Centrifuge: rapid and sensitive classification of metagenomic sequences*.  
156 Genome Res, 2016. **26**(12): p. 1721-1729.
- 157 42. Marti, J.M., *Recentrifuge: Robust comparative analysis and contamination removal for*  
158 *metagenomics*. PLoS Comput Biol, 2019. **15**(4): p. e1006967.

- 159 43. Vilsker, M., et al., *Genome Detective: an automated system for virus identification from high-*  
160 *throughput sequencing data*. *Bioinformatics*, 2019. **35**(5): p. 871-873.
- 161 44. Schubert, R.D. and M.R. Wilson, *A tale of two approaches: how metagenomics and*  
162 *proteomics are shaping the future of encephalitis diagnostics*. *Curr Opin Neurol*, 2015. **28**(3):  
163 p. 283-7.
- 164 45. Eibach, D., et al., *Viral metagenomics revealed novel betatorquevirus species in pediatric*  
165 *inpatients with encephalitis/meningoencephalitis from Ghana*. *Sci Rep*, 2019. **9**(1): p. 2360.
- 166 46. Haston, J.C., et al., *Prospective Cohort Study of Next-Generation Sequencing as a Diagnostic*  
167 *Modality for Unexplained Encephalitis in Children*. *J Pediatric Infect Dis Soc*, 2019.
- 168 47. Turner, P., et al., *The aetiologies of central nervous system infections in hospitalised*  
169 *Cambodian children*. *BMC Infect Dis*, 2017. **17**(1): p. 806.
- 170 48. Chittick, P., J.C. Williamson, and C.A. Ohl, *BK virus encephalitis: case report, review of the*  
171 *literature, and description of a novel treatment modality*. *Ann Pharmacother*, 2013. **47**(9): p.  
172 1229-33.
- 173 49. Melis, M., et al., *BK-virus progressive multifocal leukoencephalitis in a patient with systemic*  
174 *lupus erythematosus*. *Neurol Sci*, 2018. **39**(9): p. 1613-1615.
- 175 50. Yamane, A., et al., *Risk factors for developing human herpesvirus 6 (HHV-6) reactivation after*  
176 *allogeneic hematopoietic stem cell transplantation and its association with central nervous*  
177 *system disorders*. *Biol Blood Marrow Transplant*, 2007. **13**(1): p. 100-6.
- 178 51. Hill, J.A., et al., *Cord-blood hematopoietic stem cell transplant confers an increased risk for*  
179 *human herpesvirus-6-associated acute limbic encephalitis: a cohort analysis*. *Biol Blood*  
180 *Marrow Transplant*, 2012. **18**(11): p. 1638-48.
- 181 52. Zhou, X., et al., *Hepatitis E Virus Infects Neurons and Brains*. *J Infect Dis*, 2017. **215**(8): p.  
182 1197-1206.
- 183 53. Abravanel, F., et al., *Acute hepatitis E in French patients and neurological manifestations*. *J*  
184 *Infect*, 2018. **77**(3): p. 220-226.
- 185 54. Edridge, A.W.D., et al., *Viral Metagenomics on Cerebrospinal Fluid*. *Genes (Basel)*, 2019.  
186 **10**(5).
- 187 55. Bukowska-Osko, I., et al., *Sensitivity of Next-Generation Sequencing Metagenomic Analysis*  
188 *for Detection of RNA and DNA Viruses in Cerebrospinal Fluid: The Confounding Effect of*  
189 *Background Contamination*. *Adv Exp Med Biol*, 2016.
- 190 56. Singanallur, N.B., et al., *Probe capture enrichment next-generation sequencing of complete*  
191 *foot-and-mouth disease virus genomes in clinical samples*. *J Virol Methods*, 2019. **272**: p.  
192 113703.

193

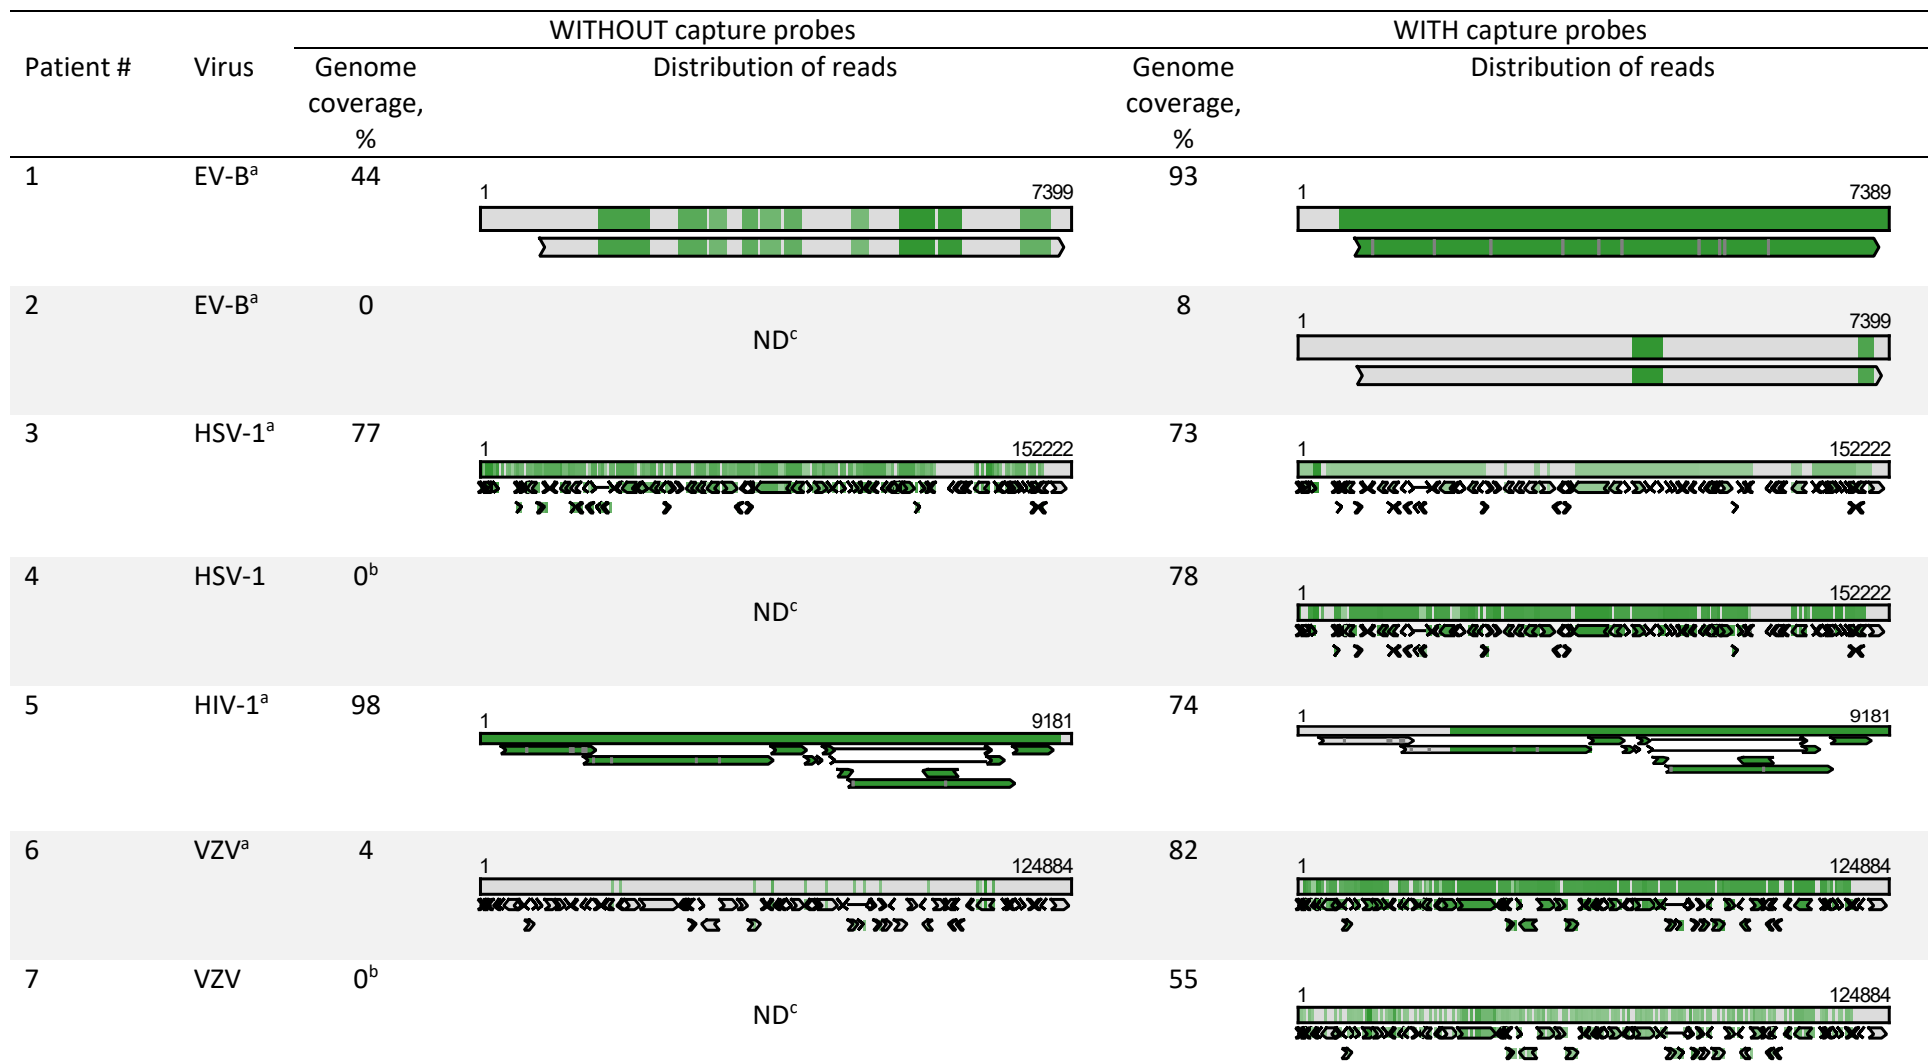

|    |                   |                |  |    |  |
|----|-------------------|----------------|--|----|--|
| 8  | VZV               | 0 <sup>b</sup> |  | 5  |  |
| 9  | EBV               | 0 <sup>b</sup> |  | 5  |  |
| 10 | EBV <sup>a</sup>  | 0.1            |  | 14 |  |
| 11 | EV-B <sup>a</sup> | 7              |  | 70 |  |
| 12 | HCMV <sup>a</sup> | 65             |  | 97 |  |
| 13 | HCMV <sup>b</sup> | 0.8            |  | 89 |  |
| 14 | HCMV <sup>b</sup> | 0.2            |  | 83 |  |
| 15 | HCMV <sup>b</sup> | 5.8            |  | 96 |  |

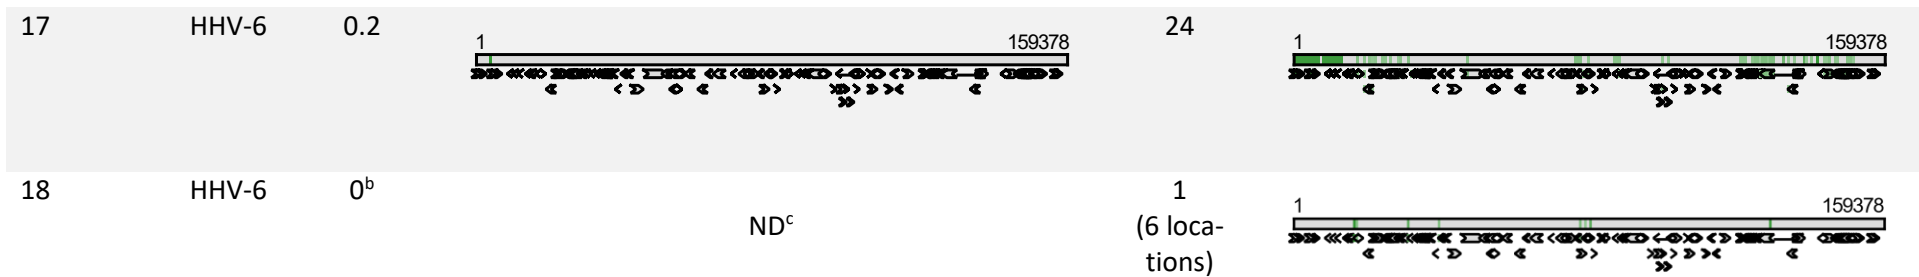

**Figure 1.** Horizontal genome coverage of PCR target viruses in technical performance study without (left) and with viral capture probes (right). Top bar represents nucleotide alignment, bottom bar(s) represents amino acid alignment, green zone: matching sequences. Sample 16 is not included because of negative PCR results.

EV-B, enterovirus type B; HCMV, human cytomegalovirus; HSV, human simplex virus; VZV, varicellovirus; HIV, human immunodeficiency virus; ND, not detected

<sup>2</sup> NEBNext Ultra II Directional RNA Library preparation kit with in-house adaptations for total NA sequencing (see table 1 and methods)

<sup>b</sup> NEBNext Ultra II DNA Library preparation kit preceded by cDNA synthesis (see table 1 and methods)

<sup>c</sup> Not detected (GenomeDetective)
